# Supplementary material for: In situ growth of hierarchical boehmite on 2024 aluminum alloy surface as superhydrophobic materials
Source: Royal Society of Chemistry journal article supplement (doi:10.1039/c4ra00160e), 2014-01-01
Supplement: c4ra00160e1.pdf [file c4ra00160e1.pdf]

## Supporting Information

### In Situ Growth of Hierarchical Boehmite on 2024 Aluminum Alloy Surface as Superhydrophobic Materials

Zhijie Wang<sup>a</sup>, Jinghua Gong<sup>a</sup>, Jinghong Ma<sup>\*a</sup>, Jian Xu<sup>\*a,b</sup>

<sup>a</sup> State Key Laboratory for Modification of Chemical Fibers and Polymer Materials, College of Material Science and Engineering, Donghua University, Shanghai 201620, P. R. China.

<sup>b</sup> Laboratory of Polymer Physics and Chemistry, Institute of Chinese Academy of Sciences, Beijing 100190, P. R. China.

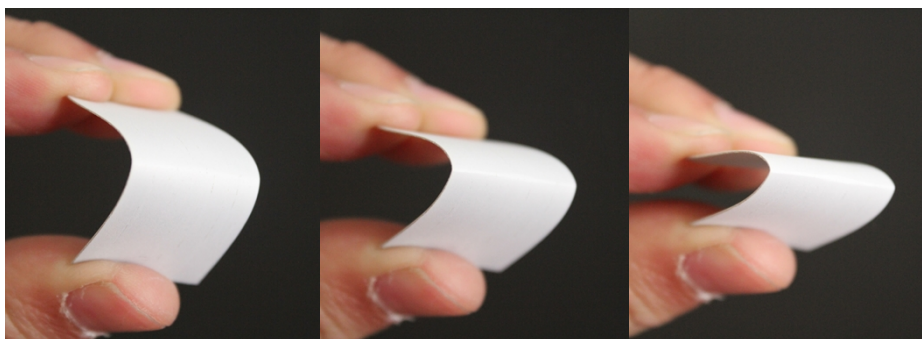

**Figure S1:** Optional pictures of the boehmite coated aluminium alloy after bending

The obtained film is flexible, and the bending causes little damage to the film.

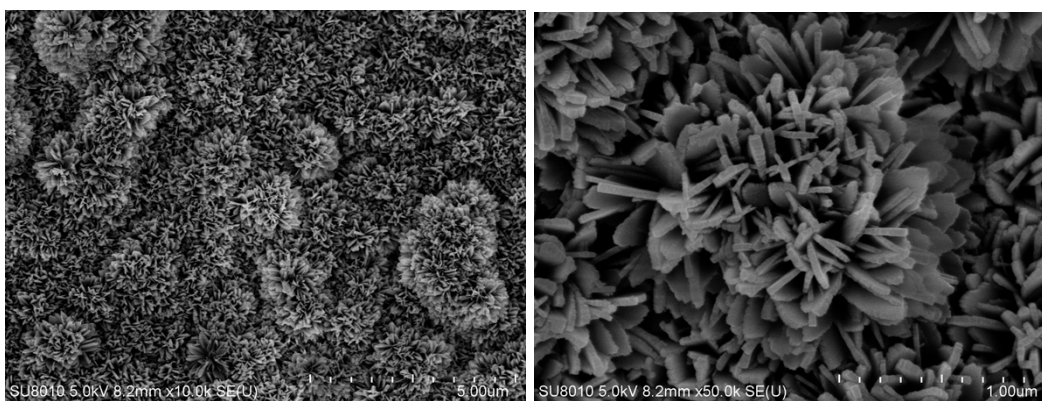

**Figure S2:** SEM images of the flowerlike boehmite film after ultrasonic treatment for 30 min.

The flowerlike structure of boehmite was successfully maintained under the mechanical force of the ultrasonication, illustrating the attachment of the coating to the surface are very strong.
